# Supplementary material for: Does pre-existing morbidity influences risks and benefits of total hip replacement for osteoarthritis: a prospective study of 6682 patients from linked national datasets in England
Source: HighWire-hosted journal article supplement (doi:10.1136/bmjopen-2020-046712), 2021-09-01
Supplement: bmjopen-2020-046712supp002_data_supplement.pdf [file bmjopen-2020-046712supp002_data_supplement.pdf]

1 **Appendix: Interpretation of Oxford Hip Scores and EQ-5D in patients receiving a hip**  
2 **arthroplasty**

3

4 The OHS is a 12-item score with 4 levels, thus scores vary between 0-48, with higher scores  
5 being the best outcome. The clinically meaningful difference is considered to be an increase  
6 of +11 points and a change of +5 is considered statistically meaningful (ie greater than  
7 background 'noise')

8

9 Beard DJ, Harris K, Dawson J, *et al.* Meaningful changes for the Oxford hip and knee scores  
10 after joint replacement surgery. *J Clin Epidemiol* 2015; **68**: 73–9.

11

12 The EQ-5D has been very widely studied in several disease areas. There have been several  
13 studies looking at what is a clinically meaningful difference and a meta-analysis yielded an  
14 average difference of 0.18

15

16 Coretti S, Ruggeri M, McNamee P. The minimum clinically important difference for EQ-5D  
17 index: A critical review. *Expert Rev. Pharmacoeconomics Outcomes Res.* 2014; **14**: 221–33

18

19

20

21
